# Supplementary material for: Rainfall trends and variation in the Maasai Mara ecosystem and their implications for animal population and biodiversity dynamics
Source: PLoS One. 2018 Sep 19;13(9):e0202814. doi: 10.1371/journal.pone.0202814 (PMC6145597; doi:10.1371/journal.pone.0202814)
Supplement: S2 Data — Rainfall data comprising recordings from the gauge in Narok Town operated by the Kenya Meteorological Department. (XLSX) [file pone.0202814.s002.xlsx]

## Sheet: Narok_1914_2015
Year	Month1	Month2	Month3	Month4	Month5	Month6	Month7	Month8	Month9	Month10	Month11	Month12
1913				88.392	56.134	181.61	34.036	15.24	32.512	9.144	24.638	72.898	All blue values were verified against the ledger book: total monthly values were recorded in inches and converted to millimetres
1914	93.2	48.5	221.5	51.3	140.2	6.9	26.7	59.2	19.8	0	75.9	3.3	All red values were provided by KMD in millimetres but monthly cards
1915	0	37.6	111	156.5	106.9	20.8	2.5	7.1	6.6	4.1	60.5	82.3	were not found and hence these values were not verified
1916	119.4	129.3	129.5	115.1	161.3	15.8	0	27.7	47.2	47.2	4.8	25.9	All other values were verified against daily records on the monthly cards: availed in millimetres
1917	239.8	132.8	111.8	218.2	60.7	150.4	44.2	50	13	55.1	38.1	0
1918	75.7	7.1	1.3	52.1	110.2	13.7	27.2	20.3	0	10.2	16.5	16.5
1919	13.5	168.4	135.4	244.3	57.9	12.7	34.3	16.3	37.6	59.7	38.4	42.9
1920	78.7	6.1	172.2	240.3	59.2	27.4	0	0	17	9.7	83.3	157.5
1921	21.1	123.2	5.3	27.7	76.2	34	26.4	30	6.1	40.6	73.4	8.9
1922	68.3	110.7	183.1	87.4	32.5	3.1	2.5	66	14.2	15.5	40.9	63.2
1923	20.3	109.2	89.4	229.9	292.9	0	0	2.5	10.7	62.5	4.6	48.3
1924	3.1	135.1	36.1	66.6	65	12.2	16.5	21.6	19.3	2.5	62.2	25.4
1925	261	73.7	82.8	10.7	36.6	41.9	29	1	16.5	10.9	238.3	117.9
1926	101.3	46.5	39.1	187.7	20.6	0	18.3	9.4	58.7	118	59.9	55.4
1927	88.9	28.4	140.5	97	22.1	0.3	2.5	40.4	19.8	14	23.4	72.6
1928	31	43.4	54.6	81.8	108	21.1	0	4.1	5.8	87.6	22.1	72.1
1929	26.2	3.6	64.3	97.3	135.1	2.5	59.2	15.5	10.2	5.1	30.2	79
1930	91.4	176.5	256	282.2	160.3	14.2	27.4	0.8	97	21.3	76.7	6.6
1931	27.7	67.8	194.1	159.5	33	6.9	0	2.5	39.6	9.4	58.7	101.6
1932	11.9	15.7	140	137.7	47.8	9.9	19.6	7.4	10.9	17.8	49.3	120.4
1933	108	56.6	15.5	11.9	6.9	0	7.1	13	8.1	2	0.5	24.4
1934	6.6	107.2	43.7	69.9	41.1	24.9	6.1	4.6	9.7	9.7	18	39.6
1935	0.8	205.5	32	45.7	127.5	105.9	0	3	0	35.1	18	66.5
1936	61.9	82.3	101.4	119.9	82.3	24.7	15.3	17	18.4	26.7	52.3	54
1937	62	84.3	105.9	121.2	83.8	25.1	15.5	17	18.7	28.6	54	55.3
1938	3.8	49.5	114.6	33.3	36.8	10.4	3.6	0	7.9	47.2	43.7	33
1939	55.6	15.5	58.9	307.1	38.9	25.9	1.3	8.6	4.1	6.1	45.2	6.9
1940	30.2	131.1	146.8	156.5	139.7	32.3	9.1	4.3	10.9	4.3	68.3	47.5
1941	91.2	47.8	39.6	113.3	49.8	13	12.4	19.8	27.2	14.7	88.4	192.5
1942	57.4	12.7	265.7	115.6	248.2	37.3	0	49	9.1	2	4.3	35.8
1943	37.6	103.6	6.9	41.4	95.3	52.1	5.3	1	4.1	17	37.6	28.7
1944	26.4	47.2	114	102.4	41.1	25.1	13.7	4.3	36.1	17.8	145	79.2
1945	82	62.7	46.7	58.4	97.3	45	30.5	13.5	4.8	10.7	142	20.8
1946	8.1	5.6	47.5	98.3	53.6	27.7	1.8	27.4	81	20.3	24.9	61
1947	136.9	125.2	169.4	219.5	196.3	49.5	22.1	1.3	5.3	0.5	16.8	50
1948	26.9	3.3	64.8	117.9	22.9	21.3	16	64.3	64	10.4	26.2	63
1949	25.7	35.1	7.6	193.8	6.6	38.1	0.8	3.8	6.4	11.4	18	138.2
1950	72.4	93.5	223.8	190.5	18.8	24.1	4.6	34.3	17	54.6	9.1	14.2
1951	140.7	91.2	89.4	419.6	46	39.1	11.2	23.6	17	47.8	63	130
1952	33.8	64.8	39.9	202.4	200.7	0	29	13.5	24.1	8.4	27.2	7.6
1953	45.5	10.7	16.3	121.9	27.7	14	1.8	24.6	20.1	24.1	27.4	62.7
1954	88.4	59.2	3.8	278.9	170.4	17.5	38.4	4.6	13.2	23.4	22.1	87.1
1955	14.2	198.4	79.8	99.3	14	18	26.2	105.2	58.2	13.2	68.6	103.4
1956	208.8	93.5	94.5	128.5	48	20.1	6.9	67.6	20.3	17	100.1	88.9
1957	132.8	53.8	93	267.5	250.7	85.3	0	0	6.4	14.2	44.2	131.3
1958	104.6	124.7	130.8	99.1	196.3	24.4	47.2	10.4	10.7	25.4	38.4	141.2
1959	50.5	56.6	224	25.7	55.6	10.4	8.4	38.9	11.9	15.5	152.7	83.6
1960	94.5	47.8	212.1	154.2	9.7	7.1	12.7	15	59.9	34.5	120.9	38.1
1961	8.4	46	40.4	70.6	102.4	33.5	0.5	18.8	25.4	25.4	289.3	371.6
1962	223	19.6	93.5	182.9	216.9	47.7	1	32.3	20.1	104.4	68.1	87.9
1963	192.7	59.7	91.8	263	243.1	14.3	41.7	33.8	0	1	187.4	231.4
1964	66.4	136.6	124.3	230.5	44	24.6	47.7	62.2	23.7	35.1	11.5	25.8
1965	57.9	57	59.3	84.5	76.4	20.8	5.9	8.8	43	15.8	75.2	64.5
1966	38.4	191.3	130.9	185.8	18.3	12.7	9	42.7	43.5	29.1	45.3	11.7
1967	4.6	52.9	44.3	153.3	187	11.6	18.9	2.8	43.8	32.6	55.7	82.6
1968	18.7	101.5	177.9	281.2	83.5	61.9	11.2	1.6	6	16.6	68.6	54.3
1969	129.5	152.1	51.1	43.6	101.5	18.8	2.5	5.9	40.1	20.4	74.9	23.2
1970	328.4	72	183.3	139.9	141.5	43.9	26	6.7	7.8	23.2	13.8	59.7
1971	63.8	34.9	28.2	175	104.4	7.9	28.6	129.7	1.5	14.1	6.9	92.1
1972	82.7	160.1	59.8	36.2	119	125.2	1.8	4.6	3.9	79.7	135.2	67
1973	138.4	224.2	6.7	48	55.6	66.6	3.4	12.4	109.6	36.5	89.7	42.8
1974	8.8	18.2	138.6	310.1	53.3	45.1	74.1	3.8	18.3	0.2	35.1	54.7
1975	40.7	5.9	101.2	80.2	67.9	6.8	54.3	4.1	72.9	60.2	9.4	79.3
1976	36.4	12.8	16.5	96.3	60.8	60.3	17.1	26	29.1	11.1	78.5	38.5
1977	92.4	96.5	46.7	246.5	126	8.8	42.2	45.9	22.9	46.5	130.6	118.8
1978	135.3	144.4	368.7	122.9	28	13.1	1.3	25.6	17.8	8.3	20	125.8
1979	86.7	173.9	137.8	162.6	101	49	22.2	5.5	8.2	4	39.4	52.1
1980	90.4	10.8	91.3	179	171.9	11.7	1.8	4.4	12.4	32.6	117.7	39.7
1981	12.7	66.7	111.5	84.5	113	13.9	19.1	2.3	15.5	4.1	29.9	38.6
1982	23.1	60.2	29.5	130.5	103.1	36.1	8.7	2.5	50.9	68.6	159.6	93.1
1983	22.9	62.5	19.9	124.1	84.8	52.5	22.4	38.9	26.9	51.6	37.7	91.7
1984	45.3	4	13.8	98.2	6	0.9	21.5	16.6	20.4	23.2	26.8	120.5
1985	10	161.5	78.6	287.3	51.9	56.1	19.7	2.6	15.3	3.7	81.4	78.5
1986	46.9	19.5	25.7	129.1	78.3	9.4	7.4	0	12.4	10.7	54.7	95.4
1987	157.8	59.2	174.4	85	142.8	55	55	13.1	26.4	0.5	81	12.4
1988	164.6	8.3	168.5	272.2	54.4	10.5	17.4	40.2	5.2	18.5	7	56.6
1989	210.3	119.6	96.4	137.4	90.2	21.6	31.7	45.3	78.4	5.1	25	225.4
1990	35.9	122.9	163.3	153.5	84.9	14.2	2.5	25.4	14.7	61.7	14.7	29.3
1991	55.2	0	79.1	130.2	117.8	44.3	9.1	11.2	3	63.7	22.8	62
1992	14.4	84.3	49.8	126.4	35.8	18.2	52.8	6.2	11.8	38	12.8	48.9
1993	258.2	106.3	38.2	15.8	151.1	90.5	0.8	34.4	0.6	24.3	52.7	48.3
1994	58.4	118.1	109.1	140	103.1	16.2	8.9	46	0	21.5	135	25.9
1995	39.7	56.2	141.6	66.3	142.8	32.9	7	24.2	61	19	38.2	34.3
1996	81.7	124.2	140.6	85.9	18.2	113.8	89.2	35.8	25.3	8.8	52.5	40.1
1997	37.1	6.3	54.9	247.6	144.1	26.6	9.1	34.5	10	38.8	254.3	126
1998	205.6	172.9	13.9	131	191.8	61.2	3.3	31.5	40.7	10.5	27.6	7.3
1999	37.5	5.2	291.5	64.8	21.7	3.9	2.9	23.5	20.1	9.5	73	102.5
2000	17.6	18	60.5	71.3	18.7	2.4	4.6	11.4	15.1	9.3	143.9	86.8
2001	232.9	80	56.1	136	26.2	22.6	51.5	24.2	21.3	33.1	19.3	35.6
2002	166.1	59.2	95	120.6	140.4	2.9	9.6	10.1	12.2	47.6	186.7	194.8
2003	103.6	73	54.9	156.4	261.4	8.6	2.5	79.3	8.9	19.9	22.1	15.4
2004	25.3	79.3	121.8	235.4	78.8	3.2	0	0	43.3	9.3	28.1	78.4
2005	25.1	45.8	114.5	81.7	126.7	7.8	21.6	12.5	7.6	15.4	22.3	13.6
2006	101.3	61	133.4	210.8	59.1	1.6	21.6	32	21.7	1	271	154.5
2007	105.9	143.2	59.5	89.9	97.2	25.6	10.8	22.4	69.4	9	30.3	39.7
2008	8.6	100	201.3	88.9	7.8	1.4	9.2	23.1	35.1	56.7	86.3	1.6
2009	52.9	24.4	22.6	103.9	107.7	36.7	0.5	3.1	17.2	33.7	53.5	123.8
2010	150.4	103.4	93.3	69.4	113.9	11.1	5.1	36.9	59.6	49.2	69.3	38.1
2011	59.8	34.9	97	16.1	54.8	33.1	19.6	47.9	86.2	146.8	143.6	146.4
2012	2.7	60.6	43.8	20.8	87.4	8.6	22.6	48.8	3.6	17.3	56.9	198.5
2013	63.4	73.6	102.9	183	60.6	2.7	16.4	14.9	75.1	0	12.7	80.5
2014	66.9	110.8	139.2	11.8	20.6	40.4	23.7	17.1	50.1	48.4	55.6	119.6	66.9 for January 2014 is the average of Jan 2013 and Jan 2015 because
2015	70.4	50.8	17.8	161.2	167.8	49.2	26	13	7.2	63.6	190.4	144.8	there was no record provided by KMD
