# Supplementary material for: Rainfall trends and variation in the Maasai Mara ecosystem and their implications for animal population and biodiversity dynamics
Source: PLoS One. 2018 Sep 19;13(9):e0202814. doi: 10.1371/journal.pone.0202814 (PMC6145597; doi:10.1371/journal.pone.0202814)
Supplement: S2 Table — (XLSX) [file pone.0202814.s019.xlsx]

## Sheet: Tabelle1
S 2 Table 1 Significance analysis of components (based on the final state) of monthly rainfall.
	Maraa			Narokb
S 2 Table The estimated variances of the disturbance terms and the damping factor of the autoregressive component for the monthly rainfall components.
		Maraa				Narokb
Component	Parameter	Estimate	Standard error	t Value	Approx. P-value c	Estimate	Standard error	t Value	Approx. P-valuec
Level	Stochastic disturbance	1.02e-06	0.0004965	0	0.9984	0.1215	0.2208	0.55	0.5821
Season	Stochastic disturbance	8.19445e-07	0.000186	0	0.9965	4.09e-06	0.0002052	0.02	0.9841
Autoregressive	Stochastic disturbance	0.03862	0.04115	0.94	0.3479	0.15759	0.02875	5.48	<0.0001
Autoregressive	Damping factor	2270.84	132.299	17.16	<0.0001	2670.77	112.033	23.84	<0.0001
aRainfall recordings were derived from 15 gauges (Eq. 3 in S 1 Text) during 1965-2015.
bRainfall was recorded during 1913-2015.
cBased on t-test. Significant components are marked in bold face font.
